# Supplementary material
Source: publisher figshare collection journal article supplement (https://geolsoc.figshare.com/articles/dataset/_/3453332)
Supplement: Supplementary file 1 [file 1]

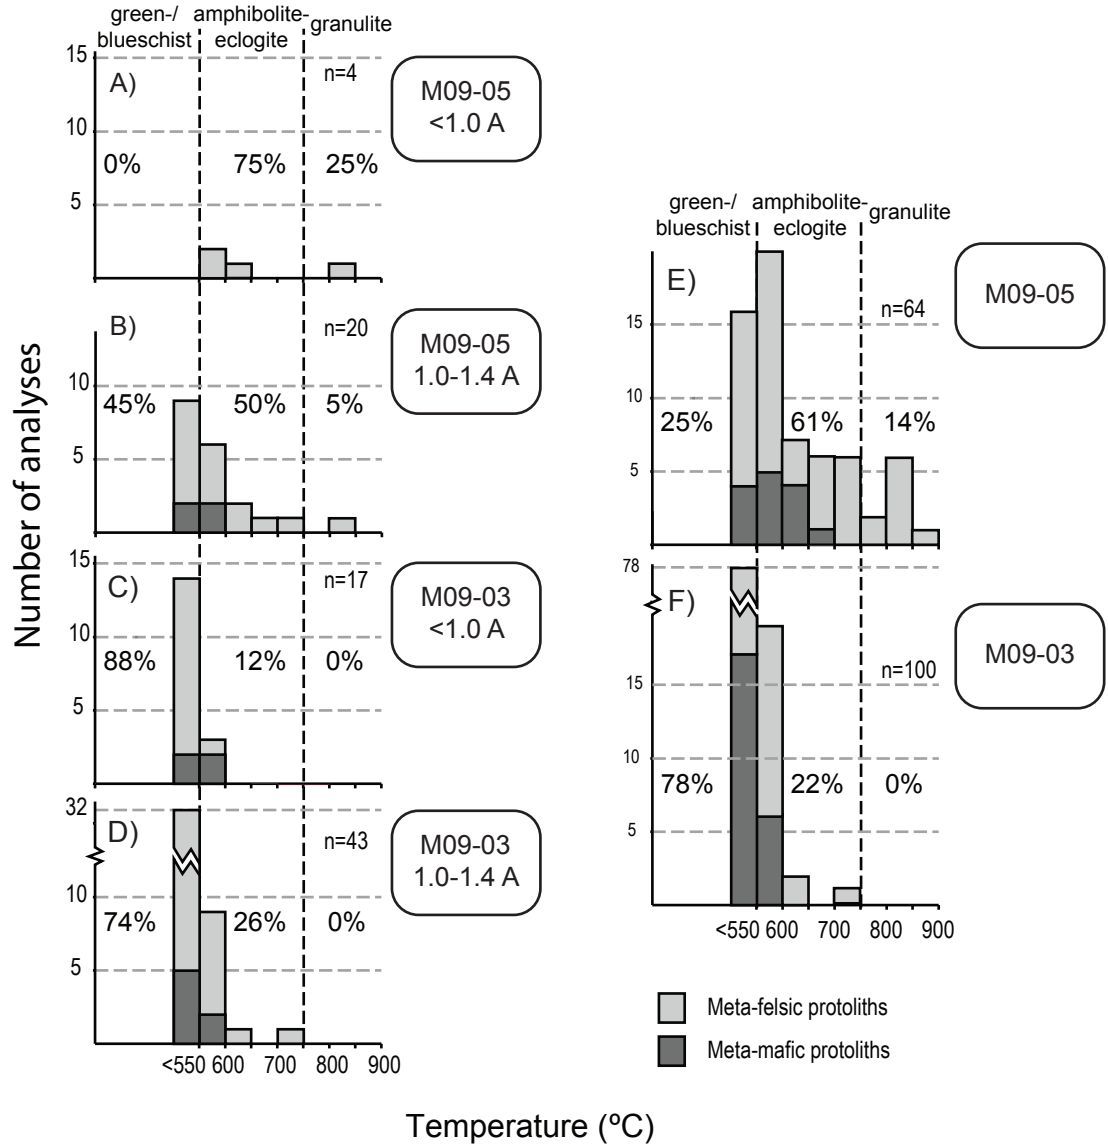

Appendix 2. A-D) Histograms of rutile temperature data from magnetic fractions. E, F) Magnetic and non-magnetic rutile data combined. Data from the magnetic fractions confirm the presence of high grade rutile in M09-05, and reproduce the dominantly greenschist to low amphibolite facies temperatures in M09-03 recorded in the non-magnetic fraction. The total proportion of meta-mafic rutile in the magnetic fractions are 17% (M09-05) and 18% (M09-03), slightly lower than in the non-magnetic fractions.
